# Supplementary material
Source: publisher site journal article supplement (https://www.dovepress.com/article/577426)
Supplement: Supplementary file 1 [file 577426%20Revised%20Supplemental%20data.pdf]

## Supplemental data table

**Table S1: Patient characteristics**

| HL Patient | Age (Years) | SEX    | Diagnosis (histological subgroups) | C-reactive protein (mg/L) | WBC (Gpt/l) | IgG (g/l) | IgA (g/l) | IgM (g/l) | CCL17 (pg/ml) | ESR (mm/hr) | ESR group | Stage | B-Symptoms | Bulky disease | E-Lesions | qPET value | ERAqPET group |
|------------|-------------|--------|------------------------------------|---------------------------|-------------|-----------|-----------|-----------|---------------|-------------|-----------|-------|------------|---------------|-----------|------------|---------------|
| HL_G1_11   | 15.5        | female | cHL (Nodular sclerosis)            | 153.6                     | 18.23       | 13.65     | 1.53      | 1.95      | 63149.64      | 72          | ESRover30 | IV    | yes        | yes           | no        | 0          | Negative      |
| HL_G1_12   | 17.9        | female | cHL (Mixed cellularity))           | 24                        | 5.03        | 8.16      | 1.14      | 0.8       | 18143.32      | 8           | ESRlow    | III   | no         | no            | no        | 0          | Negative      |
| HL_G1_13   | 17.9        | male   | cHL (Nodular sclerosis)            | 6.8                       | 14.39       | 12.5      | 1.82      | 0.59      | 265939.92     | 14          | ESRlow    | II    | no         | no            | no        | 0          | Negative      |
| HL_G1_5    | 13.3        | male   | cHL (Mixed cellularity)            | 1                         | 5           | 13.5      | 2.55      | 0.25      | 553.37        | 15          | ESRlow    | III   | no         | no            | no        | 0          | Negative      |
| HL_G1_9    | 9.8         | female | cHL (Nodular sclerosis)            | 4.5                       | 10.3        | 16        | 1.76      | 0.63      | 23101.64      | 70          | ESRover30 | III   | no         | no            | no        | 0.56       | Negative      |
| HL_G1_4    | 17          | male   | cHL (Nodular sclerosis)            | 23                        | 7.36        | 14.7      | 2.16      | 2.1       | 23088.92      | 28          | ESRlow    | II    | no         | no            | no        | 0.67       | Negative      |
| HL_G1_3    | 3.9         | female | cHL (Mixed cellularity)            | 54.3                      | 5           | 6.39      | 0.8       | 0.34      | 63050.55      | 32          | ESRover30 | II    | no         | yes           | no        | 0.95       | Negative      |
| HL_G1_1    | 8           | male   | cHL (Mixed cellularity)            | 143.5                     | 28.61       | 14        | 2.09      | 1.33      | n.d.          | 90          | ESRover30 | II    | yes        | yes           | yes       | 0.95       | Negative      |
| HL_G1_10   | 8.7         | male   | cHL (Mixed cellularity)            | 0.3                       | 5.8         | 10.9      | 0.67      | 0.32      | 14206.62      | 2           | ESRlow    | II    | no         | no            | no        | 0.96       | Negative      |
| HL_G1_6    | 16.9        | female | cHL (Nodular sclerosis)            | 148.68                    | 37.42       | 14.7      | 2.55      | 3.11      | n.d.          | n.d.        | n.d.      | II    | yes        | yes           | yes       | 1.05       | Negative      |
| HL_G1_2    | 9           | female | cHL (Mixed cellularity)            | 23                        | 5.94        | 12.7      | 2.16      | 0.97      | 27574.43      | 68          | ESRover30 | II    | no         | no            | no        | 1.06       | Negative      |
| HL_G1_7    | 17.9        | male   | cHL (Nodular sclerosis)            | 71                        | 11.21       | 12.55     | 1.79      | 1.07      | 223483.37     | 25          | ESRlow    | IV    | yes        | yes           | yes       | 1.12       | Negative      |
| HL_G1_8    | 15.6        | male   | cHL (Nodular sclerosis)            | 22.22                     | 9.98        | 13.2      | 2.17      | 2.44      | 261702.11     | 58          | ESRover30 | II    | no         | yes           | no        | 1.24       | Negative      |
| HL_G2_6    | 18          | male   | cHL (Nodular sclerosis)            | 59.2                      | 11.9        | 17.6      | 2.97      | 1.16      | 275051.77     | 6           | ESRlow    | II    | yes        | yes           | no        | 1.44       | Positive      |
| HL_G2_12   | 10.5        | male   | cHL (Mixed cellularity)            | 2.6                       | 6.1         | 9.3       | 2.04      | 0.34      | 84054.03      | 65          | ESRover30 | II    | no         | no            | no        | 1.47       | Positive      |
| HL_G2_8    | 11.4        | male   | cHL (Nodular sclerosis)            | 42                        | 8.9         | 15.4      | 2.02      | 0.68      | 165927.62     | 41          | ESRover30 | III   | no         | yes           | no        | 1.55       | Positive      |
| HL_G2_1    | 16          | female | cHL (Nodular sclerosis)            | 111                       | 22.57       | 10.4      | 1.1       | 0.86      | 281265.14     | 23          | ESRlow    | II    | no         | no            | no        | 1.61       | Positive      |
| HL_G2_3    | 3.4         | male   | cHL (Mixed cellularity)            | 25.8                      | 11.3        | 10.84     | 1.12      | 1.35      | 59857.79      | 8           | ESRlow    | II    | no         | no            | no        | 1.63       | Positive      |
| HL_G2_10   | 17.6        | female | cHL (Nodular sclerosis)            | 49.4                      | 9.02        | 14.9      | 2.01      | 1.85      | 225287.13     | 99          | ESRover30 | II    | no         | yes           | no        | 1.72       | Positive      |
| HL_G2_11   | 11.1        | male   | cHL (Mixed cellularity)            | 20.4                      | 7.69        | 13.77     | 2.7       | 0.52      | 148023.95     | 85          | ESRover30 | IV    | yes        | no            | yes       | 2.02       | Positive      |
| HL_G2_2    | 5.6         | female | cHL (Mixed cellularity)            | 4                         | 5.6         | 6.5       | 0.94      | 0.59      | 175332.08     | 10          | ESRlow    | III   | no         | no            | no        | 2.1        | Positive      |
| HL_G2_4    | 16.3        | female | cHL (Nodular sclerosis)            | 24                        | 7.9         | 17.04     | 2.81      | 0.65      | 273592.16     | 100         | ESRover30 | IV    | no         | no            | no        | 2.15       | Positive      |
| HL_G2_7    | 16.8        | female | cHL (Nodular sclerosis)            | 19                        | 11          | n.d.      | n.d.      | n.d.      | 89473.85      | 23          | ESRlow    | III   | no         | no            | no        | 2.26       | Positive      |
| HL_G2_5    | 16.2        | male   | cHL (Nodular sclerosis)            | 121                       | 15.98       | 13.4      | 3.5       | 0.93      | 321982.02     | 119         | ESRover30 | IV    | yes        | no            | no        | 2.36       | Positive      |
| HL_G2_9    | 17.3        | male   | cHL (HL-others)                    | 118                       | 24.4        | 37.74     | 5.31      | 0.97      | 237536.33     | 91          | ESRover30 | II    | yes        | yes           | yes       | 2.74       | Positive      |
| HL_G3_4    | 13.9        | male   | cHL (Mixed cellularity)            | 5                         | 6.4         | 15.7      | 1.8       | 0.9       | 2527.25       | 15          | ESRlow    | IV    | no         | no            | no        | 3.1        | Positive      |
| HL_G3_8    | 5.5         | male   | cHL (Mixed cellularity)            | 116                       | 12.1        | 10.69     | 2.23      | 1.63      | 54072.44      | 110         | ESRover30 | II    | yes        | yes           | yes       | 3.25       | Positive      |
| HL_G3_9    | 16.9        | male   | cHL (Nodular sclerosis)            | 70                        | 24.51       | 12.9      | 2.18      | 0.719     | 313049.97     | 83          | ESRover30 | IV    | yes        | yes           | yes       | 3.26       | positive      |
| HL_G3_1    | 13.4        | male   | cHL (Nodular sclerosis)            | 128                       | 19.15       | 6.9       | 0.92      | 0.9       | n.d.          | 87          | ESRover30 | IV    | yes        | No            | yes       | 3.67       | Positive      |
| HL_G3_10   | 14.3        | female | cHL (Nodular sclerosis)            | 87.1                      | 10.1        | 23.7      | 2.89      | 0.56      | 147170.16     | 52          | ESRover30 | III   | yes        | yes           | no        | 3.83       | Positive      |
| HL_G3_3    | 17.3        | female | cHL (Mixed cellularity)            | 7                         | 16.6        | n.d.      | n.d.      | n.d.      | 236043.15     | 33          | ESRover30 | II    | no         | yes           | no        | 3.9        | Positive      |
| HL_G3_2    | 16.5        | female | cHL (Nodular sclerosis)            | 91.6                      | 9.7         | 14        | 0.86      | 2.19      | 280654.76     | 95          | ESRover30 | II    | no         | yes           | yes       | 4.08       | Positive      |
| HL_G3_7    | 9.7         | male   | cHL (Nodular sclerosis)            | 34                        | 13.7        | 23.4      | 3.17      | 0.86      | 255461.41     | 39          | ESRover30 | IV    | yes        | yes           | yes       | 4.71       | Positive      |
| HL_G3_5    | 15.6        | male   | cHL (Mixed cellularity)            | 106.2                     | 14.9        | 32.4      | 3.72      | 0.87      | 296767.86     | 79          | ESRover30 | II    | yes        | yes           | yes       | 6          | Positive      |
| HL_G3_6    | 7.9         | female | cHL (Mixed cellularity)            | 101.5                     | 7.9         | n.d.      | n.d.      | n.d.      | 269434.83     | 84          | ESRover30 | II    | yes        | yes           | yes       | 8.08       | Positive      |

n.d. – No data

**Table S2:** List of miRNAs (TMM >50) dysregulated in pre-induction ERAqPET–positive versus –negative samples, previously reported in adult classical HL studies

| miRNA detected in pediatric cHL study | Reported in adult cHL studies     | Expression in cHL tissue compared to non-malignant tissue | Reported expression |
|---------------------------------------|-----------------------------------|-----------------------------------------------------------|---------------------|
| let-7a-5p                             | Reference <sup>1,2,3</sup>        | Plasma, Whole Blood, cHL cell lines                       | Up/down             |
| let-7b-5p                             | Reference <sup>2,3</sup>          | cHL cell lines, Whole Blood                               | Up/down             |
| let-7d-3p                             | Reference <sup>1,3</sup>          | Plasma, Serum                                             | Up/down             |
| let-7e-5p                             | Reference <sup>4</sup>            | cHL cell lines                                            | Up/down             |
| let-7f-5p                             | Reference <sup>1,2,4,5</sup>      | Plasma, cHL cell lines                                    | Up/down             |
| let-7g-5p                             | Reference <sup>4,6,5</sup>        | HRS cells, cHL cell lines                                 | Up                  |
| let-7i-5p                             | Reference <sup>1</sup>            | Plasma                                                    | Down                |
| miR-1                                 | Reference <sup>1,3</sup>          | Plasma, Whole Blood                                       | Up/Down             |
| miR-100-5p                            | Reference <sup>1,4</sup>          | Plasma, cHL cell lines                                    | Up/down             |
| miR-101-3p                            | Reference <sup>1,2,3</sup>        | Plasma, Serum, cHL cell lines                             | Up/down             |
| miR-103a-3p                           | Reference <sup>4,5</sup>          | cHL cell lines                                            | Up                  |
| miR-10b-5p                            | Reference <sup>5</sup>            | cHL cell lines                                            | Up                  |
| miR-1180-3p                           | Reference <sup>5</sup>            | cHL cell lines                                            | Up                  |
| miR-122-5p                            | Reference <sup>1,3</sup>          | Plasma, Whole Blood                                       | Down                |
| miR-125a-5p                           | Reference <sup>1,7,6</sup>        | Plasma, HRS cells, cHL LN-RLN,                            | Up/down             |
| miR-125b-5p                           | Reference <sup>1,2</sup>          | Plasma, cHL cell lines                                    | Up/down             |
| miR-126-3p                            | Reference <sup>1,3,5</sup>        | Plasma, Serum, cHL cell lines                             | Up/down             |
| miR-126-5p                            | Reference <sup>1,5</sup>          | Plasma, cHL cell lines                                    | Up/down             |
| miR-151a-3p                           | Reference <sup>3</sup>            | Whole Blood, Serum                                        | Up/down             |
| miR-1301-3p                           | Reference <sup>3,2,5</sup>        | Whole Blood, cHL cell lines                               | Up                  |
| miR-190b                              | Reference <sup>3</sup>            | Whole Blood                                               | Down                |
| miR-130b-3p                           | Reference <sup>8,4,1,2,5</sup>    | cHL LN-HLcl, cHL cell lines                               | Up                  |
| miR-140-3p                            | Reference <sup>6,7,1</sup>        | Plasma, HRS cells, cHL cell lines, cHL LN-RLN             | Up/down             |
| miR-142-3p                            | Reference <sup>4,7</sup>          | cHL LN-RLN, cHL cell lines                                | Up/Down             |
| miR-142-5p                            | Reference <sup>1,4,2</sup>        | Plasma, cHL cell lines                                    | Up/Down             |
| miR-143-3p                            | Reference <sup>1,3,6,2</sup>      | Plasma, Whole Blood, HRS cells, cHL cell lines            | Down/Up             |
| miR-144-3p                            | Reference <sup>1</sup>            | Plasma                                                    | Down                |
| miR-145-5p                            | Reference <sup>1,9,7,6</sup>      | Plasma, cHL LN-RLN, HRS cells                             | Up/down             |
| miR-193a-5p                           | Reference <sup>3</sup>            | Serum, Whole Blood                                        | Up/down             |
| miR-148a-3p                           | Reference <sup>1,2,5</sup>        | Plasma, cHL cell lines                                    | Down                |
| miR-150-5p                            | Reference <sup>3,4,6,2,5</sup>    | Serum, HRS cells, cHL cell lines                          | Up/down             |
| miR-199b-5p                           | Reference <sup>3</sup>            | Whole Blood                                               | Up                  |
| miR-155-5p                            | Reference <sup>9,10,4,6,2,5</sup> | Plasma, HRS cells, cHL LN-RLN, cHL cell lines             | Up                  |
| miR-15a-5p                            | Reference <sup>1</sup>            | Plasma                                                    | Down                |
| miR-15b-3p                            | Reference <sup>4,7</sup>          | cHL LN-RLN, cHL cell lines                                | Up/down             |
| miR-16-5p                             | Reference <sup>4,6</sup>          | HRS cells, cHL cell lines                                 | Up                  |
| miR-17-5p                             | Reference <sup>4</sup>            | cHL cell lines                                            | Up                  |
| miR-181a-2-3p                         | Reference <sup>2,5</sup>          | cHL cell lines                                            | Down                |
| miR-181a-3p                           | Reference <sup>7,2</sup>          | cHL LN-RLN, cHL cell lines                                | Up                  |
| miR-320b                              | Reference <sup>3</sup>            | Serum                                                     | Up                  |
| miR-182-5p                            | Reference <sup>1,7,6</sup>        | Plasma, cHL LN-RLN, cHL cell lines                        | Up/down             |
| miR-139-3p                            | Reference <sup>4,10</sup>         | cHL cell lines, cHL-RLN                                   | Down                |
| miR-186-5p                            | Reference <sup>1,6</sup>          | Plasma, HRS cells, cHL cell lines                         | Up                  |
| miR-320c                              | Reference <sup>3</sup>            | Serum                                                     | Up                  |
| miR-320d                              | Reference <sup>3</sup>            | Serum                                                     | Up                  |
| miR-191-3p                            | Reference <sup>1</sup>            | Plasma                                                    | Up                  |
| miR-191-5p                            | Reference <sup>4,2</sup>          | cHL cell lines, cHL cell lines                            | Up                  |
| miR-421                               | Reference <sup>3</sup>            | Whole Blood                                               | Up                  |

|             |                                     |                                            |         |
|-------------|-------------------------------------|--------------------------------------------|---------|
| miR-195-5p  | Reference <sup>2,5</sup>            | HRS, cHL cell lines                        | Up      |
| miR-4732-3p | Reference <sup>3</sup>              | Whole Blood                                | down    |
| miR-197-3p  | Reference <sup>1</sup>              | Plasma                                     | Down    |
| miR-532-3p  | Reference <sup>3</sup>              | Serum                                      | Up      |
| miR-19a-3p  | Reference <sup>4</sup>              | cHL cell lines                             | Up      |
| miR-19b-3p  | Reference <sup>4</sup>              | cHL cell lines                             | Up      |
| miR-629-5p  | Reference <sup>3</sup>              | Serum                                      | Up      |
| miR-205-5p  | Reference <sup>3,7</sup>            | Serum, cHL cell lines                      | Up/down |
| miR-20a-5p  | Reference <sup>9,7,4,6</sup>        | cHL LN-RLN, cHL cell lines, HRS cells      | Up      |
| miR-20b-5p  | Reference <sup>4,2</sup>            | cHL cell lines                             | Down/Up |
| miR-210-3p  | Reference <sup>1</sup>              | Plasma                                     | Down    |
| miR-21-5p   | Reference <sup>8,7,10,4,6,2,5</sup> | HRS, cHL LN-RLN, cHL cell lines            | Up      |
| miR-221-3p  | Reference <sup>1</sup>              | Plasma                                     | Down    |
| miR-222-3p  | Reference <sup>1</sup>              | Plasma                                     | Down    |
| miR-223-3p  | Reference <sup>2,6</sup>            | HRS cells, cHL cell lines                  | Up      |
| miR-874-3p  | Reference <sup>3</sup>              | Whole Blood                                | Down    |
| miR-23a-3p  | Reference <sup>8,4,1,2,5</sup>      | cHL cell lines, cHL LN RLN, cHL cell lines | Up/down |
| miR-23b-3p  | Reference <sup>7,5</sup>            | cHL cell lines                             | Up/down |
| miR-24-3p   | Reference <sup>1,6,2</sup>          | Plasma, HRS cells                          | Up/down |
| miR-25      | Reference <sup>8,1,4,6</sup>        | Plasma, cHL LN-RLN, cHL cell lines         | Up      |
| miR-26a-5p  | Reference <sup>8,7,1</sup>          | Plasma, cHL LN-RLN, cHL cell lines         | Up/Down |
| miR-26b-3p  | Reference <sup>1,6</sup>            | Plasma, cHL cell lines                     | Up      |
| miR-146b-5p | Reference <sup>5</sup>              | cHL cell lines                             | Up      |
| miR-27a-3p  | Reference <sup>3,7,2,5</sup>        | cHL cell lines, Serum                      | Up      |
| miR-27b-3p  | Reference <sup>2,5</sup>            | cHL cell lines                             | Up      |
| miR-28-3p   | Reference <sup>2,3</sup>            | cHL cell lines, Whole Blood                | Up      |
| miR-29a-3p  | Reference <sup>4,10,2</sup>         | cHL-RLN, cHL LN-RLN, cHL cell lines        | Up/down |
| miR-29b-3p  | Reference <sup>4</sup>              | cHL cell lines                             | Up      |
| miR-29c-3p  | Reference <sup>1,4</sup>            | Plasma, cHL cell lines                     | Up/down |
| miR-30a-5p  | Reference <sup>6,2,5</sup>          | HRS, cHL cell lines                        | Down/Up |
| miR-30c-5p  | Reference <sup>1</sup>              | Plasma                                     | Down    |
| miR-30d-5p  | Reference <sup>1</sup>              | Plasma                                     | Up      |
| miR-30e-5p  | Reference <sup>1,2</sup>            | Plasma, cHL cell lines                     | Up      |
| miR-320a    | Reference <sup>9,8,2</sup>          | cHL LN-RLN, cHL cell lines                 | Up      |
| miR-196b-5p | Reference <sup>5</sup>              | cHL cell lines                             | Up      |
| miR-339-3p  | Reference <sup>5</sup>              | cHL cell lines                             | Down    |
| miR-98-5p   | Reference <sup>5</sup>              | cHL cell lines                             | Up      |
| miR-328-3p  | Reference <sup>9,10,3</sup>         | Whole Blood, cHL LN-RLN                    | Up/down |
| miR-335-5p  | Reference <sup>3,10,7</sup>         | Whole Blood, cHL cell lines                | Up/down |
| miR-130a-3p | Reference <sup>2</sup>              | cHL cell lines cells                       | Down    |
| miR-181a-5p | Reference <sup>2</sup>              | cHL cell lines                             | Up      |
| miR-345-5p  | Reference <sup>3,2,5</sup>          | cHL cell lines, Serum                      | Up      |
| miR-34a-5p  | Reference <sup>7,5,3</sup>          | Whole Blood, cHL LN-RLN, cHL cell lines    | Up      |
| miR-363-3p  | Reference <sup>6,2</sup>            | cHL cell lines                             | Down    |
| miR-370-3p  | Reference <sup>9,7</sup>            | cHL LN-RLN                                 | Up      |
| miR-190a-5p | Reference <sup>2</sup>              | cHL cell lines                             | Up      |
| miR-223-5p  | Reference <sup>2</sup>              | cHL cell lines                             | Down    |
| miR-340-5p  | Reference <sup>2</sup>              | cHL cell lines                             | Down    |
| miR-378a-3p | Reference <sup>2</sup>              | cHL cell lines                             | Up      |
| miR-423-3p  | Reference <sup>1</sup>              | Plasma                                     | Up      |
| miR-424-5p  | Reference <sup>2,1</sup>            | cHL cell lines, Plasma                     | Up/down |
| miR-760     | Reference <sup>2</sup>              | cHL cell lines                             | Up      |
| miR-200c-3p | Reference <sup>6</sup>              | HRS cells                                  | Up      |
| miR-486-3p  | Reference <sup>1</sup>              | Plasma                                     | Up      |
| miR-501-3p  | Reference <sup>1,3</sup>            | Plasma, Serum                              | Up/down |
| miR-503-5p  | Reference <sup>3,5</sup>            | Whole Blood, cHL cell lines                | Up      |
| miR-26b-5p  | Reference <sup>6</sup>              | cHL cell lines                             | Up      |
| miR-532-5p  | Reference <sup>1,3</sup>            | Plasma, Whole Blood                        | Up/down |

|             |                                |                                         |         |
|-------------|--------------------------------|-----------------------------------------|---------|
| miR-542-3p  | Reference <sup>3,2,5</sup>     | cHL cell lines, Whole Blood             | Up      |
| miR-374a-5p | Reference <sup>6</sup>         | HRS cells, cHL cell lines               | Up      |
| miR-375     | Reference <sup>6</sup>         | HRS cells                               | Up      |
| miR-652-3p  | Reference <sup>1,6</sup>       | Plasma, cHL cell lines                  | Up/Down |
| miR-744-5p  | Reference <sup>1,2</sup>       | cHL cell lines, Plasma                  | Up      |
| miR-485-3p  | Reference <sup>6</sup>         | HRS cells                               | Up      |
| miR-574-3p  | Reference <sup>6</sup>         | HRS cells                               | Down    |
| miR-92a-3p  | Reference <sup>8,3,4,2,5</sup> | cHL LN-RLN, Whole Blood, cHL cell lines | Up/down |
| miR-92b-3p  | Reference <sup>2,5</sup>       | cHL cell lines                          | Up      |
| miR-93-5p   | Reference <sup>4,8,1</sup>     | Plasma, cHL LN-RLN, cHL cell lines      | Up/down |
| miR-1294    | Reference <sup>3</sup>         | Whole Blood                             | Up/down |
| miR-99a-5p  | Reference <sup>2,1,3</sup>     | Plasma, Whole Blood, cHL cell lines     | Up/down |
| miR-99b-5p  | Reference <sup>1,5</sup>       | Plasma, cHL cell lines                  | Up/down |

Note: Reference list in the end of supplementary data

### Supplemental data figure:

#### Figure S1: Serum sample quality assessment

The degree of hemolysis was determined using qRT-PCR by quantifying the level of miR-451a relative to the level of miR-23a (hemolysis ratio ( $\Delta$ CT) = CTmiR-23a – CTmiR-451a). **(A)** Assessment of haemolysis; none of the serum samples showed a ratio above the threshold of Delta ( $\Delta$ )CT <5. **(B)** Hemolysis quality control in ERAqPET groups; comparison of  $\Delta$ CT values between ERAqPET subgroups (<1.3 vs.  $\geq$ 1.3) at Pretherapy (day 0) and Post-OEPA (day 57) showing no significant differences in hemolysis levels between response groups ( $p = 0.625$  and  $p = 0.781$ , respectively). **(C)** Endogenous microRNA expression; Radar plots showing homogenous relative expression of endogenous miRNAs between the samples measured before sequencing

A.

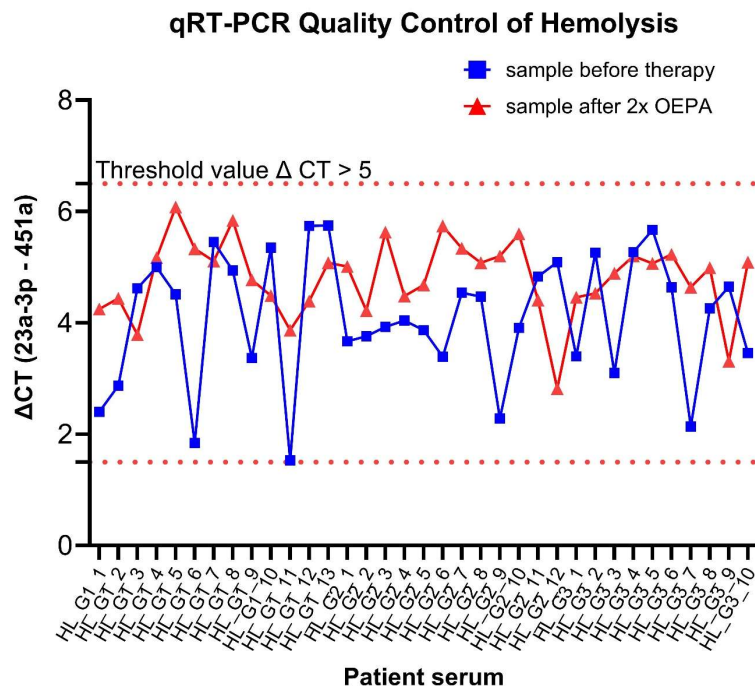

B.

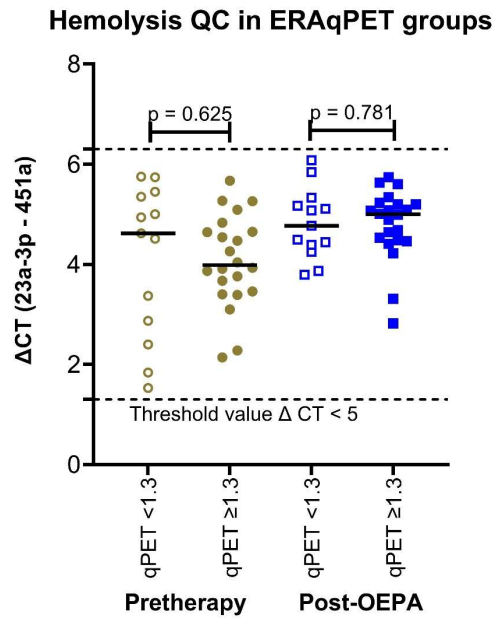

C.

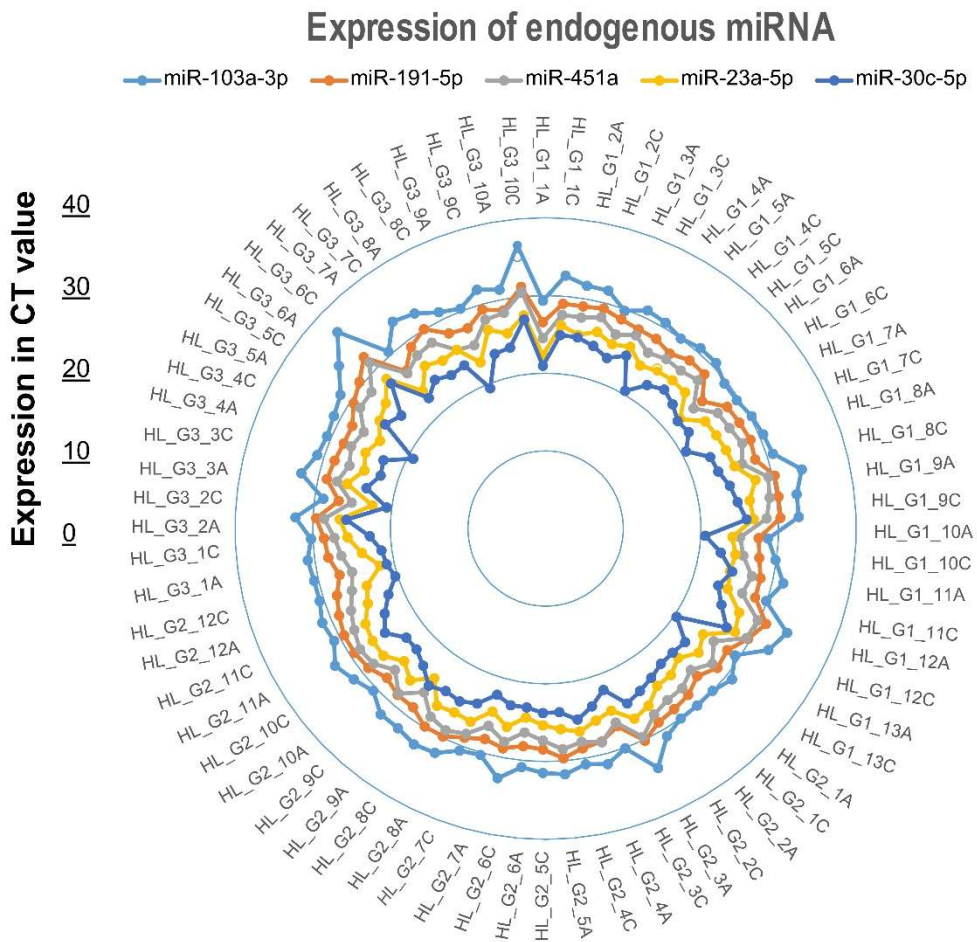

## Figure S2:

### Small RNA sequencing of serum miRNA expression profiles in HL patient and principal component analysis of sample variability.

**(A)** Number of identified known miRNAs; The mapped reads sequenced for each sample were annotated using Genome databases. Bar plot shows almost consistent number of known miRNAs detected at >1 TPM; average 488 miRNAs (dark blue) and >10 TPM; 232 miRNAs (light blue) thresholds across all samples in the discovery cohort (n=35). **(B)** Principal Component Analysis of serum-miRNA expression profiles; with a projection of the first two principal components (PC) of all serum samples within this cohort. The Quadrat represents the centre and the 95% confidence interval of the samples in all each group. Three samples out of quadrat were considered outliers (based on PC scores) and were excluded from further analysis.

#### A.

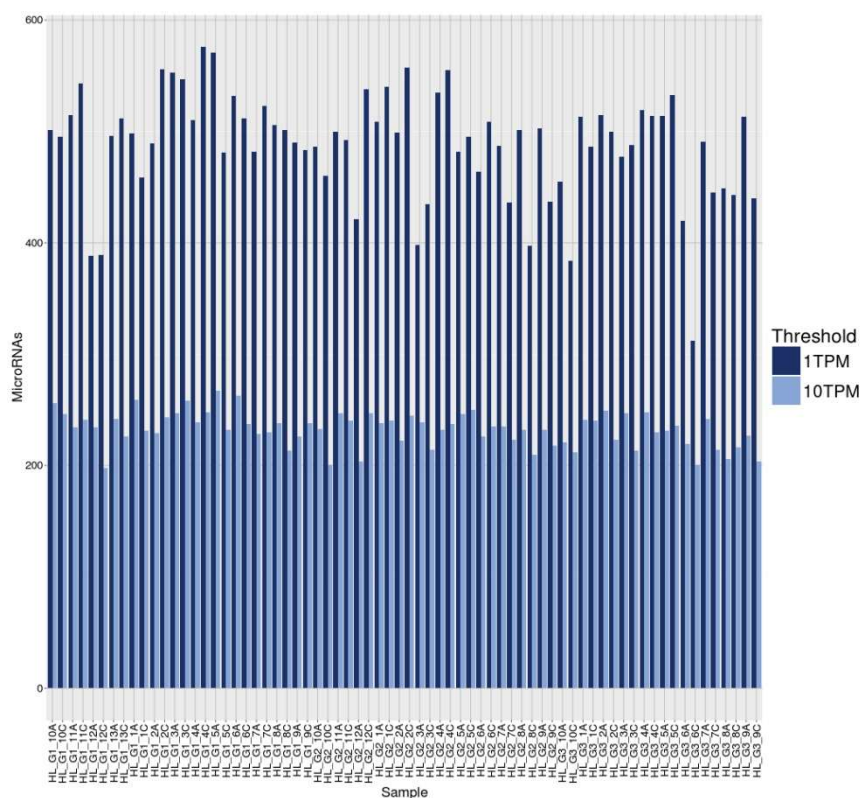

B.

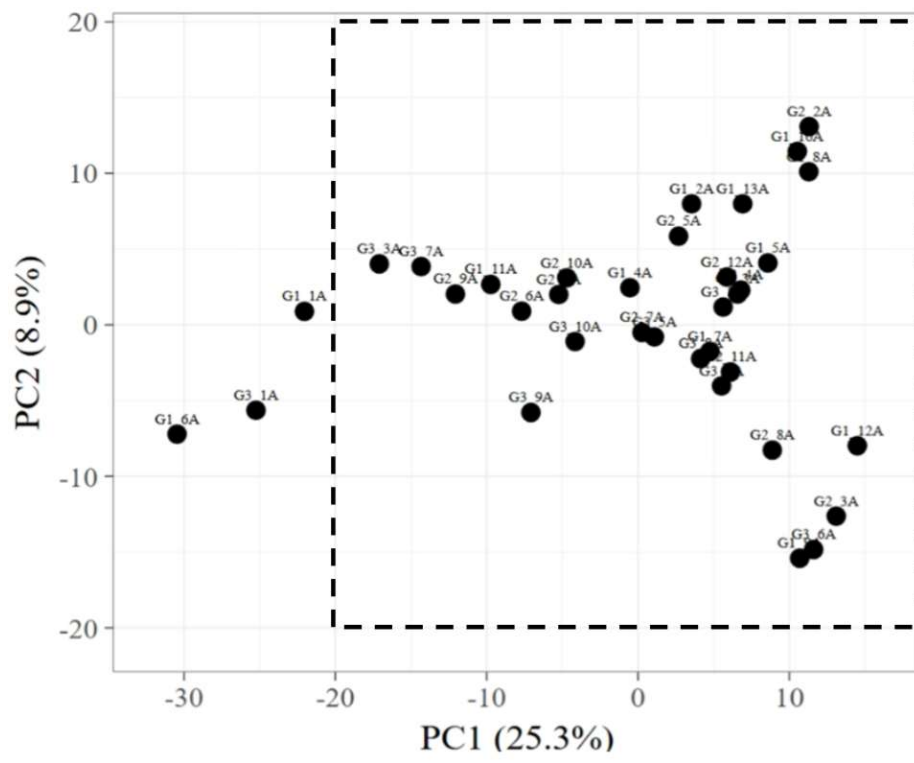

**Figure S3:**

**Extended PCA of differentially expressed miRNAs in Induction therapy responder patients.** To further explore the variance within the dataset and investigate the central overlap observed in the primary PCA (PC1 vs. PC2), additional principal components were analyzed. PCA score plots illustrate the relationship between PC3 vs. PC4 and PC5 vs. PC6. Patient samples are categorized into ERAqPET negative  $<1.3$  (red dots) and ERAqPET positive  $\geq 1.3$  (blue dots) groups.

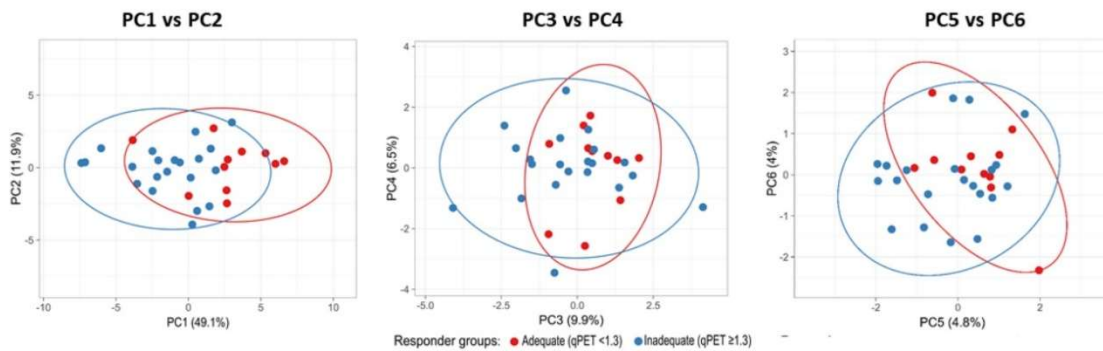

Figure S4.

**Expression of miR-148a-3p post-induction-therapy and comparison of change in miR-148a-3p expression ( $\Delta$ ) after induction-therapy**

(A) Post-induction miRNA expression at diagnosis (Day 57). Boxplots display normalized read counts ( $\log_2$ -TMM values) for miR-148a-3p. (B) Comparison of changes in miRNA expression ( $\Delta d0-d57$ ). Boxplots display changes in expression levels between Day 0 and Day 57 for candidate miRNAs on the y-axis. Boxes represent interquartile ranges (Tukey method); horizontal lines indicate medians, and whiskers show data ranges. Significant differential expression between groups is indicated ( $p < 0.05$ ).

A.

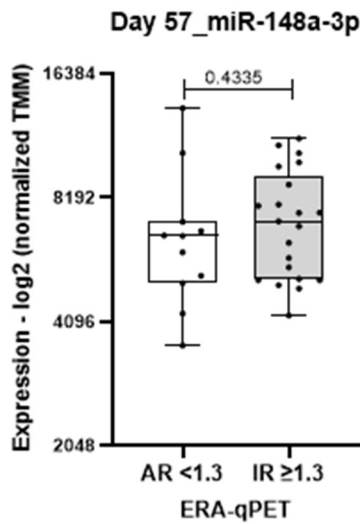

B.

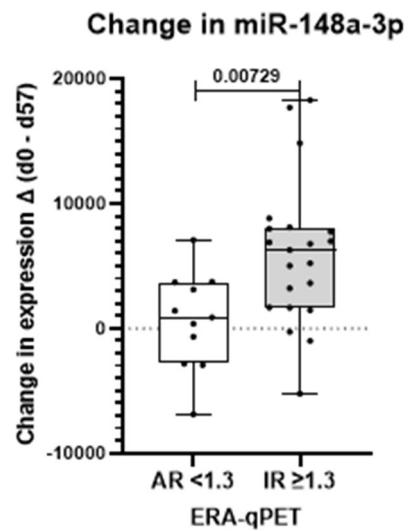

**Figure S5.**

**Comparative analysis of early response qPET and baseline miR-148a-3p expression across Sex and Age subgroups.** Early response ERAqPET values (first column) and baseline miR-148a-3p expression measured by small RNA-seq (second column) and qRT-PCR (third column) are shown for sex (top row: Female vs Male) and age (bottom row: <12 years vs ≥12 years) subgroups. miR-148a-3p qRT-PCR values are expressed as relative change over the ERAqPET-negative (AR) group mean using  $2^{-(\Delta\Delta Ct)}$  values. Small RNA-seq values are shown as log2 expression normalized by TMM. Box and Violin plots display the distribution of values; boxes and violins represent the interquartile range (Tukey method), solid horizontal lines indicate medians, and whiskers show the full data range (whiskers are dashed when drawn on violins). Significant differences between groups ( $p < 0.05$ ) are indicated.

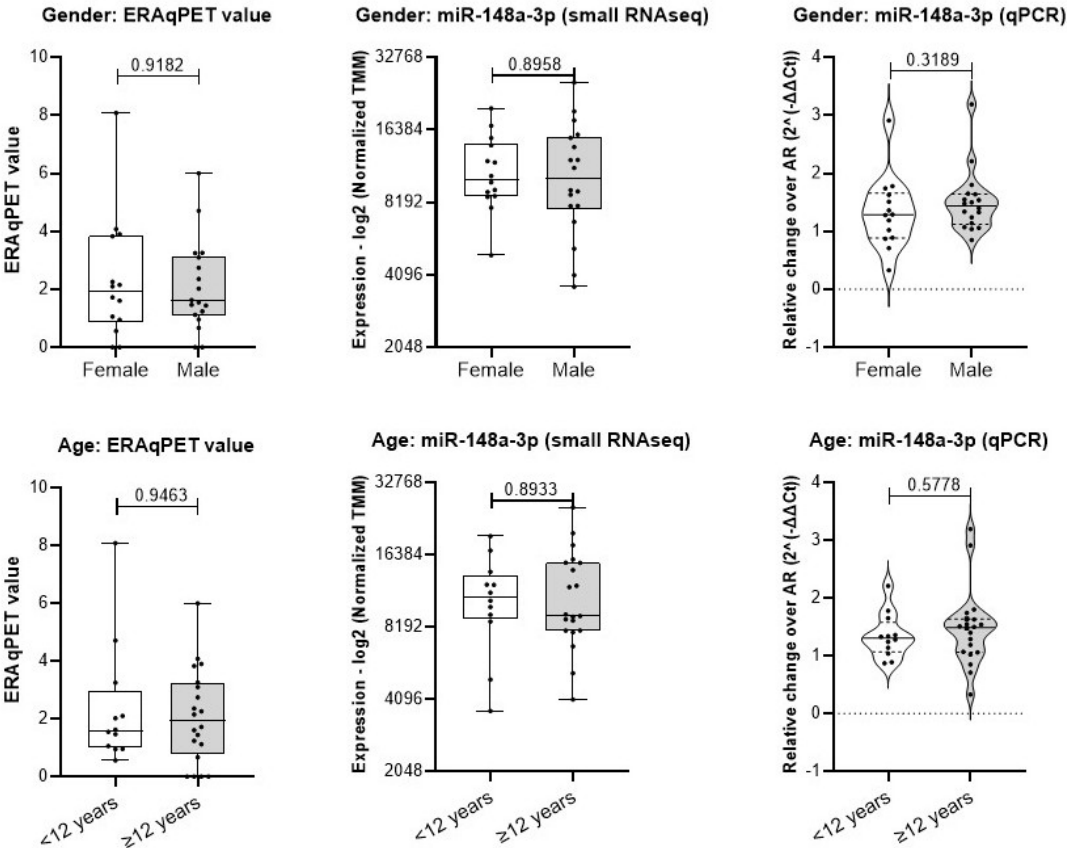

## References:

1. Khare D, Goldschmidt N, Bardugo A, Gur-Wahnon D, Ben-Dov IZ, Avni B. Plasma microRNA profiling: Exploring better biomarkers for lymphoma surveillance. *PLoS One*. 2017;12(11):e0187722. doi:10.1371/journal.pone.0187722
2. Yuan Y, Kluiver J, Koerts J, et al. miR-24-3p Is Overexpressed in Hodgkin Lymphoma and Protects Hodgkin and Reed-Sternberg Cells from Apoptosis. *Am J Pathol*. Jun 2017;187(6):1343-1355. doi:10.1016/j.ajpath.2017.02.016
3. Paszkiewicz-Kozik E, Paziewska A, Kulecka M, et al. Peripheral Blood Cells from Patients with Hodgkin's and Diffuse Large B Cell Lymphomas May Be a Better Source of Candidate Diagnostic miRNAs Than Circulating miRNAs. *Biomed Res Int*. 2021;2021:3212878. doi:10.1155/2021/3212878
4. Gibcus JH, Tan LP, Harms G, et al. Hodgkin lymphoma cell lines are characterized by a specific miRNA expression profile. *Neoplasia*. Feb 2009;11(2):167-76. doi:10.1593/neo.08980
5. Paczkowska J, Janiszewska J, Ustaszewski A, et al. Deregulated miRNAs Contribute to Silencing of B-Cell Specific Transcription Factors and Activation of NF-kappaB in Classical Hodgkin Lymphoma. *Cancers (Basel)*. Jun 23 2021;13(13)doi:10.3390/cancers13133131
6. Van Vlierberghe P, De Weer A, Mestdagh P, et al. Comparison of miRNA profiles of microdissected Hodgkin/Reed-Sternberg cells and Hodgkin cell lines versus CD77+ B-cells reveals a distinct subset of differentially expressed miRNAs. *Br J Haematol*. Dec 2009;147(5):686-90. doi:10.1111/j.1365-2141.2009.07909.x
7. Navarro A, Gaya A, Martinez A, et al. MicroRNA expression profiling in classic Hodgkin lymphoma. *Blood*. Mar 1 2008;111(5):2825-32. doi:10.1182/blood-2007-06-096784
8. Sanchez-Espiridion B, Martin-Moreno AM, Montalban C, et al. MicroRNA signatures and treatment response in patients with advanced classical Hodgkin lymphoma. *Br J Haematol*. Aug 2013;162(3):336-47. doi:10.1111/bjh.12390
9. Paydas S, Acikalin A, Ergin M, Celik H, Yavuz B, Tanriverdi K. Micro-RNA (miRNA) profile in Hodgkin lymphoma: association between clinical and pathological variables. *Med Oncol*. Apr 2016;33(4):34. doi:10.1007/s12032-016-0749-5
10. Jones K, Nourse JP, Keane C, Bhatnagar A, Gandhi MK. Plasma microRNA are disease response biomarkers in classical Hodgkin lymphoma. *Clin Cancer Res*. Jan 1 2014;20(1):253-64. doi:10.1158/1078-0432.CCR-13-1024
